# Supplementary material for: Synergy between 3D-extruded electroconductive scaffolds and electrical stimulation to improve bone tissue engineering strategies
Source: Royal Society of Chemistry journal article supplement (doi:10.1039/d3tb02673f), 2024-01-01
Supplement: d3tb02673f1.pdf [file d3tb02673f1.pdf]

1 **Synergy Between 3D-Extruded Electroconductive Scaffolds and**  
2 **Electrical Stimulation to Improve Bone Tissue Engineering**  
3 **Strategies**

4

5 (Supplementary Information)

6

7 João C. Silva,<sup>a,b,c,\*,#</sup> Pedro Marcelino,<sup>a,b,c,d</sup> João Meneses,<sup>d</sup> Frederico  
8 Barbosa,<sup>a,b,c</sup> Carla S. Moura,<sup>e</sup> Ana C. Marques,<sup>f,g</sup> Joaquim M. S. Cabral,<sup>a,b,c</sup> Paula  
9 Pascoal-Faria,<sup>d,h,j</sup> Nuno Alves,<sup>d,i,j</sup> Jorge Morgado,<sup>c,k</sup> Frederico C. Ferreira,<sup>a,b,c,\*</sup>  
10 Fábio F. F. Garrudo,<sup>a,b,c,k,\*,#</sup>

11

12 <sup>a</sup> iBB – Institute for Bioengineering and Biosciences, Instituto Superior Técnico, Universidade de  
13 Lisboa, Av. Rovisco Pais, 1049-001 Lisboa, Portugal

14 <sup>b</sup> Associate Laboratory i4HB - Institute for Health and Bioeconomy, Avenida. Rovisco Pais, 1049-  
15 001 Lisboa, Portugal

16 <sup>c</sup> Department of Bioengineering, Instituto Superior Técnico, Universidade de Lisboa, Avenida  
17 Rovisco Pais, 1049-001 Lisboa, Portugal

18 <sup>d</sup> CDRSP – Centre for Rapid and Sustainable Product Development, Polytechnic Institute of Leiria,  
19 Rua de Portugal-Zona Industrial, 2430-028 Marinha Grande, Portugal

20 <sup>e</sup> Polytechnic Institute of Coimbra, Applied Research Institute, Rua da Misericórdia, Lagar dos  
21 Cortiços – S. Martinho do Bispo, 3045-093 Coimbra, Portugal.

22 <sup>f</sup> CERENA, DEQ, Instituto Superior Técnico, Universidade de Lisboa, Avenida Rovisco Pais,  
23 Lisboa, 1049-001 Portugal.

24 <sup>g</sup> Department of Chemical Engineering, Instituto Superior Técnico, Universidade de Lisboa,  
25 Avenida Rovisco Pais, 1049-001 Lisboa, Portugal

26 <sup>h</sup> Department of Mathematics, School of Technology and Management, Polytechnic of Leiria,  
27 Morro do Lena—Alto do Vieiro, Apartado 4163, 2411-901 Leiria, Portugal

28 <sup>i</sup> Department of Mechanical Engineering, School of Technology and Management, Polytechnic of  
29 Leiria, Morro do Lena—Alto do Vieiro, Apartado 4163, 2411-901 Leiria, Portugal

30 <sup>j</sup> Associate Laboratory Arise, Porto, Portugal.

31 <sup>k</sup> Instituto de Telecomunicações, Instituto Superior Técnico, Universidade de Lisboa, Avenida  
32 Rovisco Pais, 1049-001 Lisboa, Portugal

33 # These authors contributed equally to the work

34

35 \* Corresponding Authors

36 E-mail address: joao.f.da.silva@tecnico.ulisboa.pt

37 E-mail address: frederico.ferreira@tecnico.ulisboa.pt

38 E-mail address: [fabio.garrudo@tecnico.ulisboa.pt](mailto:fabio.garrudo@tecnico.ulisboa.pt)

39

40 Prepared for *Journal of Materials Chemistry B*, November 2023; **Revised January**  
41 **2024**

42 **Table of contents**

| <b>Supplementary display item</b> | <b>Summary</b>                                                                                               | <b>Page</b> |
|-----------------------------------|--------------------------------------------------------------------------------------------------------------|-------------|
| <b>Figure S1</b>                  | FTIR profile of the materials used in the design of PCL-PEDOT scaffolds.                                     | <b>2</b>    |
| <b>Figure S2</b>                  | Stability assay results for the different PEDOT-based coatings tested on 3D-printed PCL films.               | <b>3</b>    |
| <b>Figure S3</b>                  | Study of the properties of PEDOT:PSS spin-coated films on glass.                                             | <b>4</b>    |
| <b>Figure S4</b>                  | Effect of different chemical/thermal conditions on the mechanical properties of PCL and PCL(NaOH) scaffolds. | <b>5</b>    |
| <b>Figure S5</b>                  | SEM images of the different scaffolds after 7 days of mineralization.                                        | <b>6</b>    |
| <b>Figure S6</b>                  | FEA analysis of electrical field intensity on the filaments using different configurations.                  | <b>7</b>    |
| <b>Figure S7</b>                  | FEA analysis of electrical field intensity on the different PCL-PEDOT samples tested.                        | <b>8</b>    |
| <b>Figure S8</b>                  | Visual aspect of the electrical stimulation setups used in this work.                                        | <b>9-11</b> |
| <b>Table S1</b>                   | Properties of the materials used in FEA simulation.                                                          | <b>12</b>   |

43

44

45

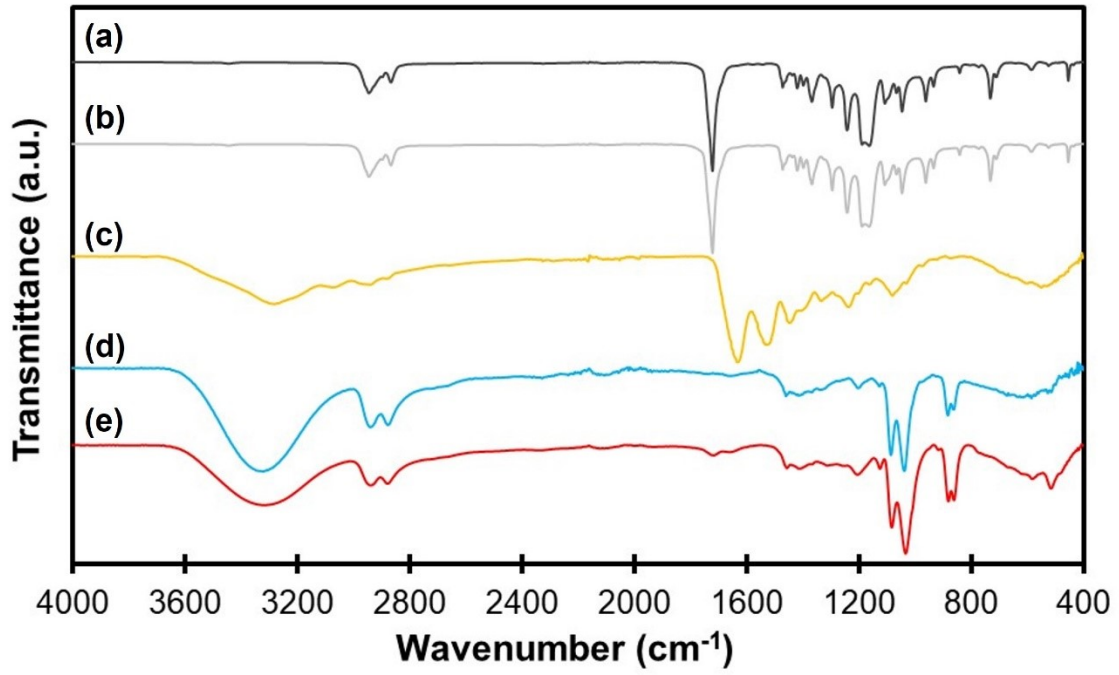

46

47 **Figure S1:** FTIR profile of the materials used in the design of PCL-PEDOT  
48 scaffolds: (a) PCL, (b) PCL(NaOH), (c) Gelatin, (d) PEDOT:PSS:GOPS, (e)  
49 PEDOT:PSS:DVS.

50

51

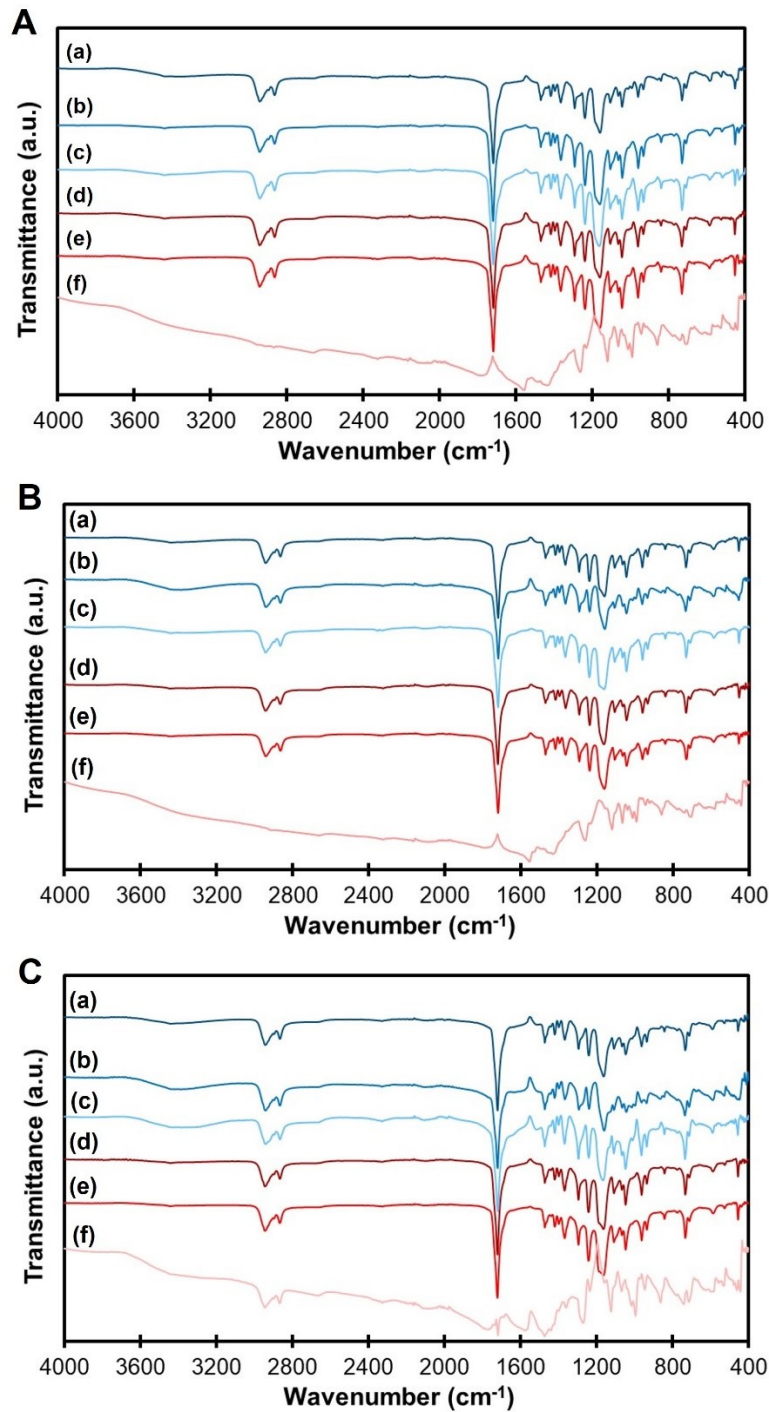

52

53 **Figure S2:** Stability assay results for the different PEDOT-based coatings tested  
 54 on 3D-printed PCL films. Chemical changes on the samples were accompanied  
 55 using FTIR also at (A) day 1, (B) day 7 and (C) day 14; (a) GOPS, (b)  
 56 GOPS(NaOH), (c) GOPS(NaOH)-Gel, (d) DVS, (e) DVS(NaOH), (f)  
 57 DVS(NaOH)-Gel.

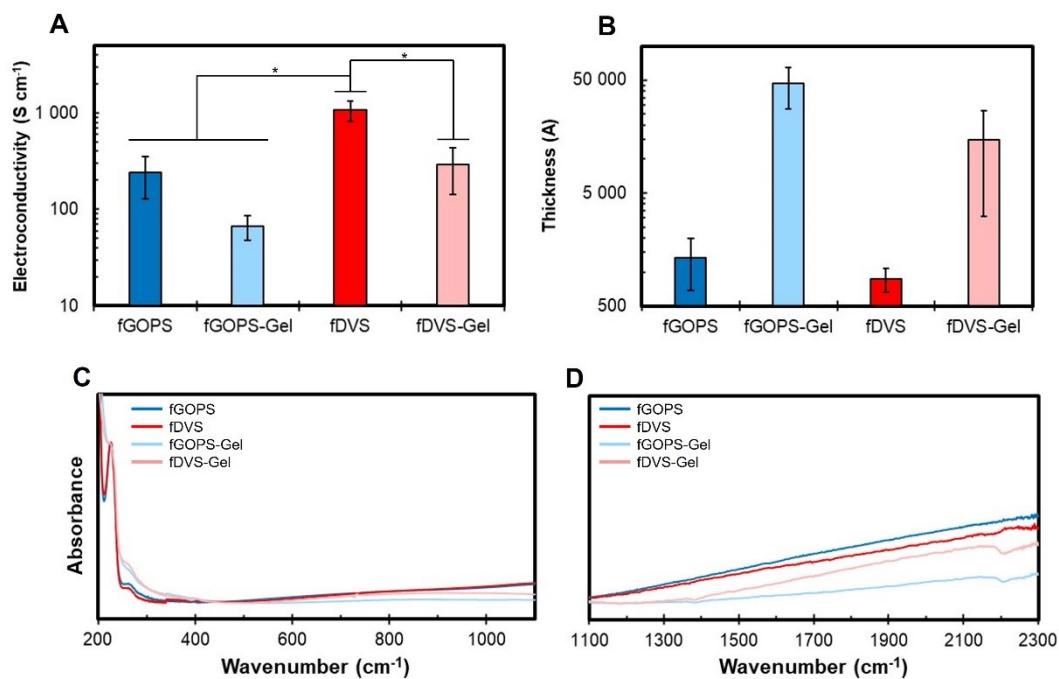

58

59 **Figure S3:** Study of the properties of PEDOT:PSS spin-coated films on glass.  
 60 **(A)** Electroconductivity of the obtained films (mean  $\pm$  std, n = 4, \* means p < 0.05)  
 61 and **(B)** respective thickness (mean  $\pm$  std, n = 4). Spectrometric analysis of the  
 62 obtained films, including **(C)** UV/Vis and **(D)** NIR.

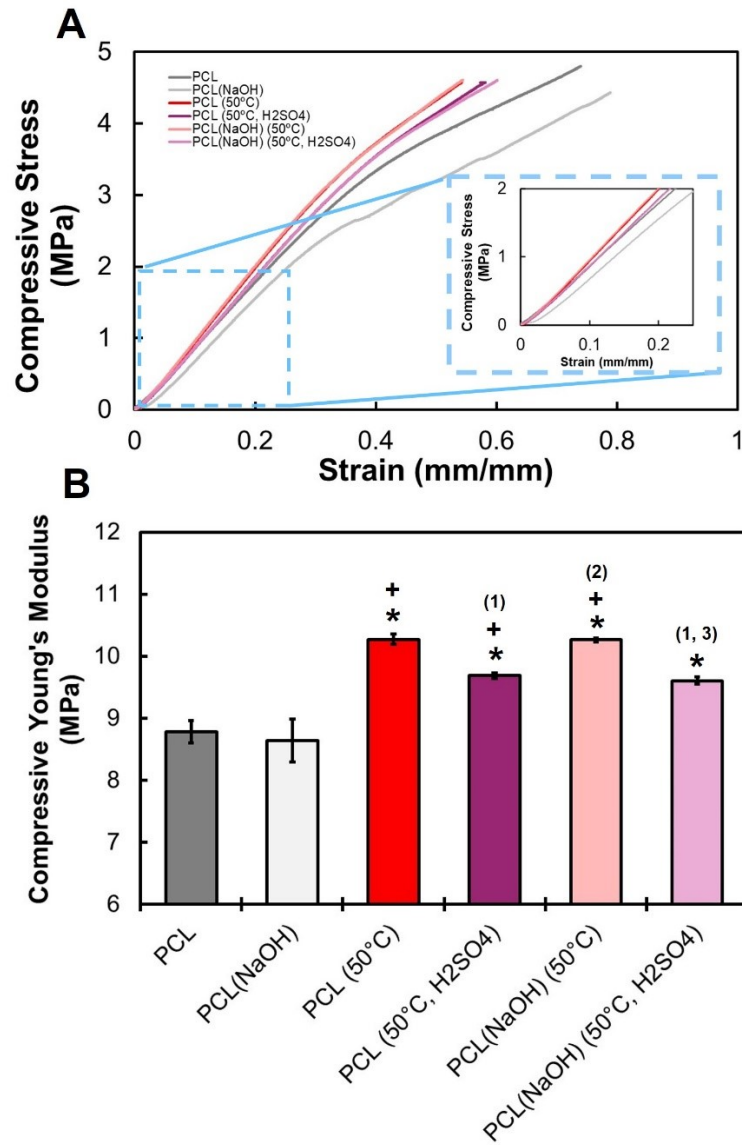

63

64 **Figure S4:** Effect of different chemical/thermal conditions on the mechanical  
 65 properties of PCL and PCL(NaOH) scaffolds: **(A)** Stress-strain curves and **(B)**  
 66 Compressive Young's Modulus (mean  $\pm$  std,  $n = 5$ ; (\*) means  $p < 0.05$  when  
 67 compared with PCL; (+) means  $p < 0.05$  compared to PCL(NaOH); (1) means  $p$   
 68  $< 0.05$  compared to PCL (50°C); (2) means  $p < 0.05$  compared to PCL (50°C,  
 69 H2SO4); (3) means  $p < 0.05$  compared to PCL(NaOH) (50°C)).

70

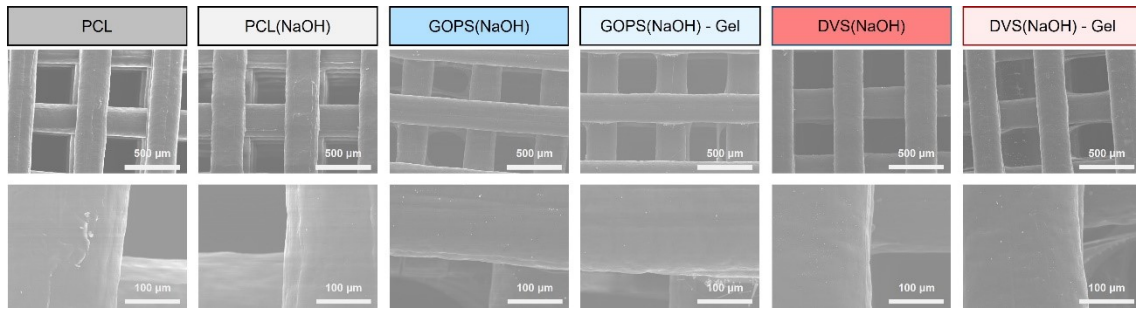

71

72 **Figure S5:** SEM images of the different scaffolds after 7 days of mineralization.

73

74



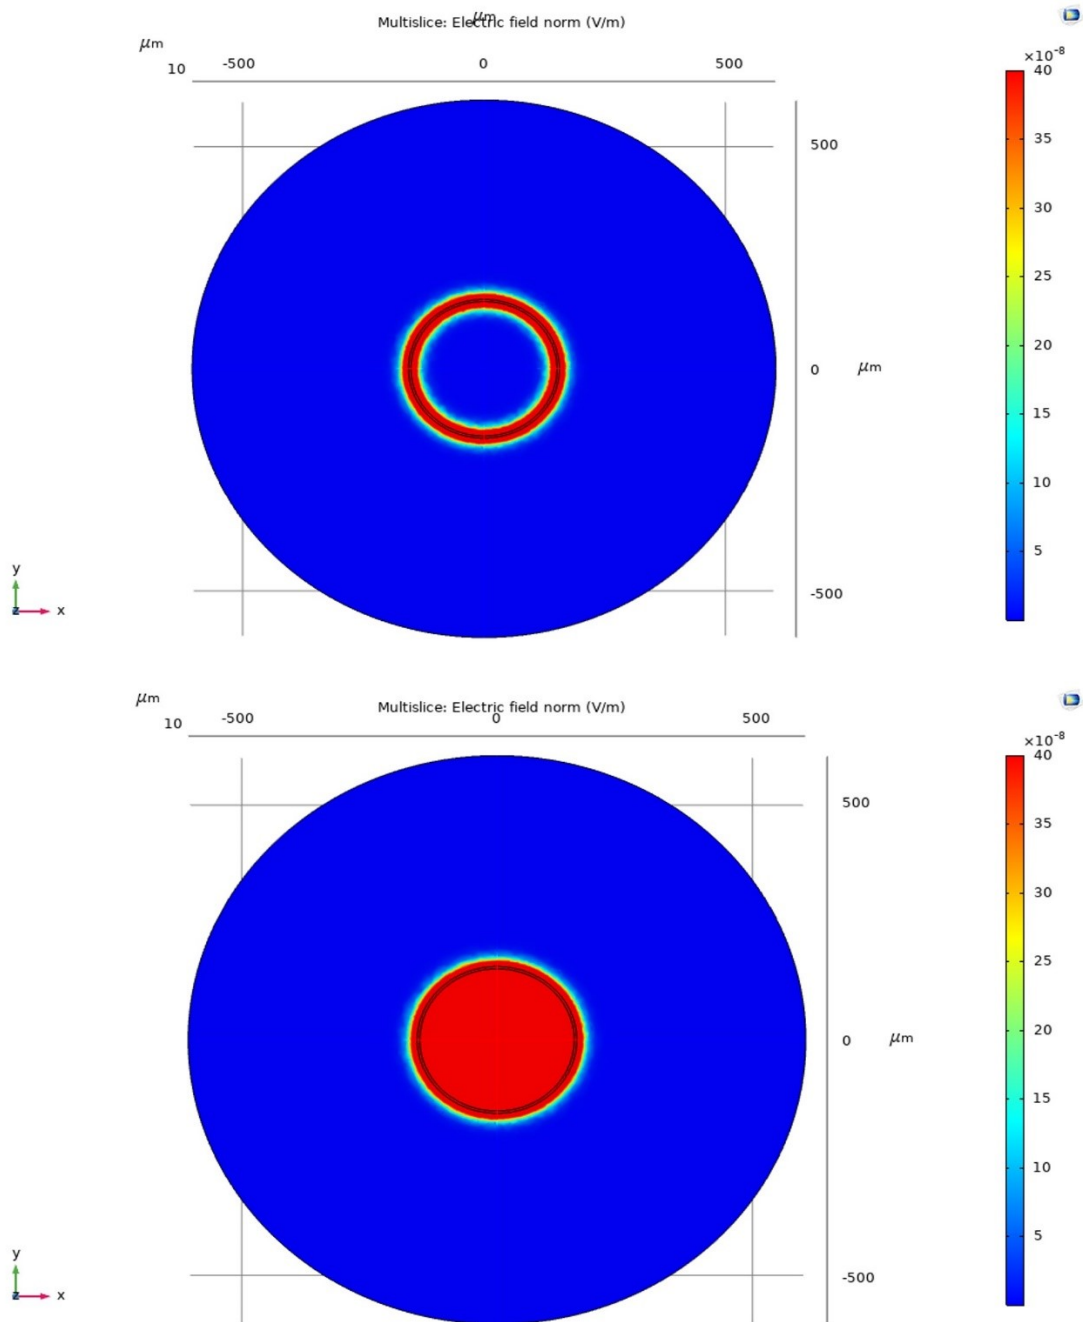

75

76 **Figure S6:** FEA analysis of electrical field intensity on the filaments using different  
 77 configurations. On the right the results from a thin homogeneous coating; on the  
 78 left the results from a whole electroconductive fiber.

**A**

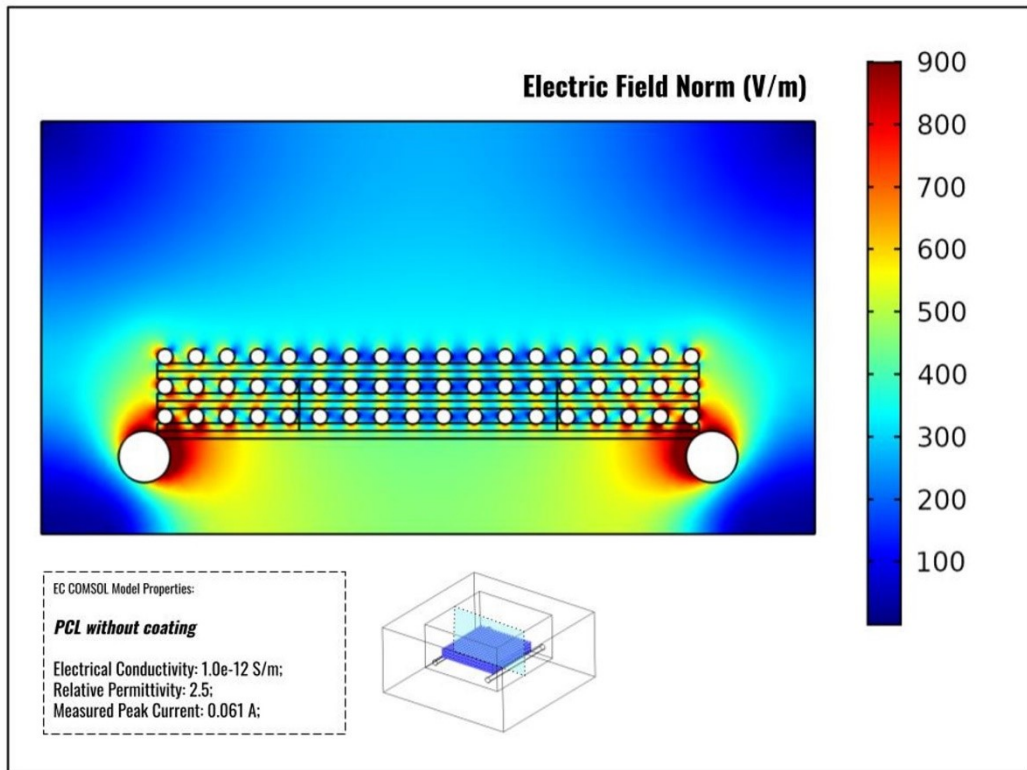

79

80 **Figure S7(A):** FEA analysis of electrical field intensity on the different PCL-  
81 PEDOT samples tested: Pristine PCL scaffolds.

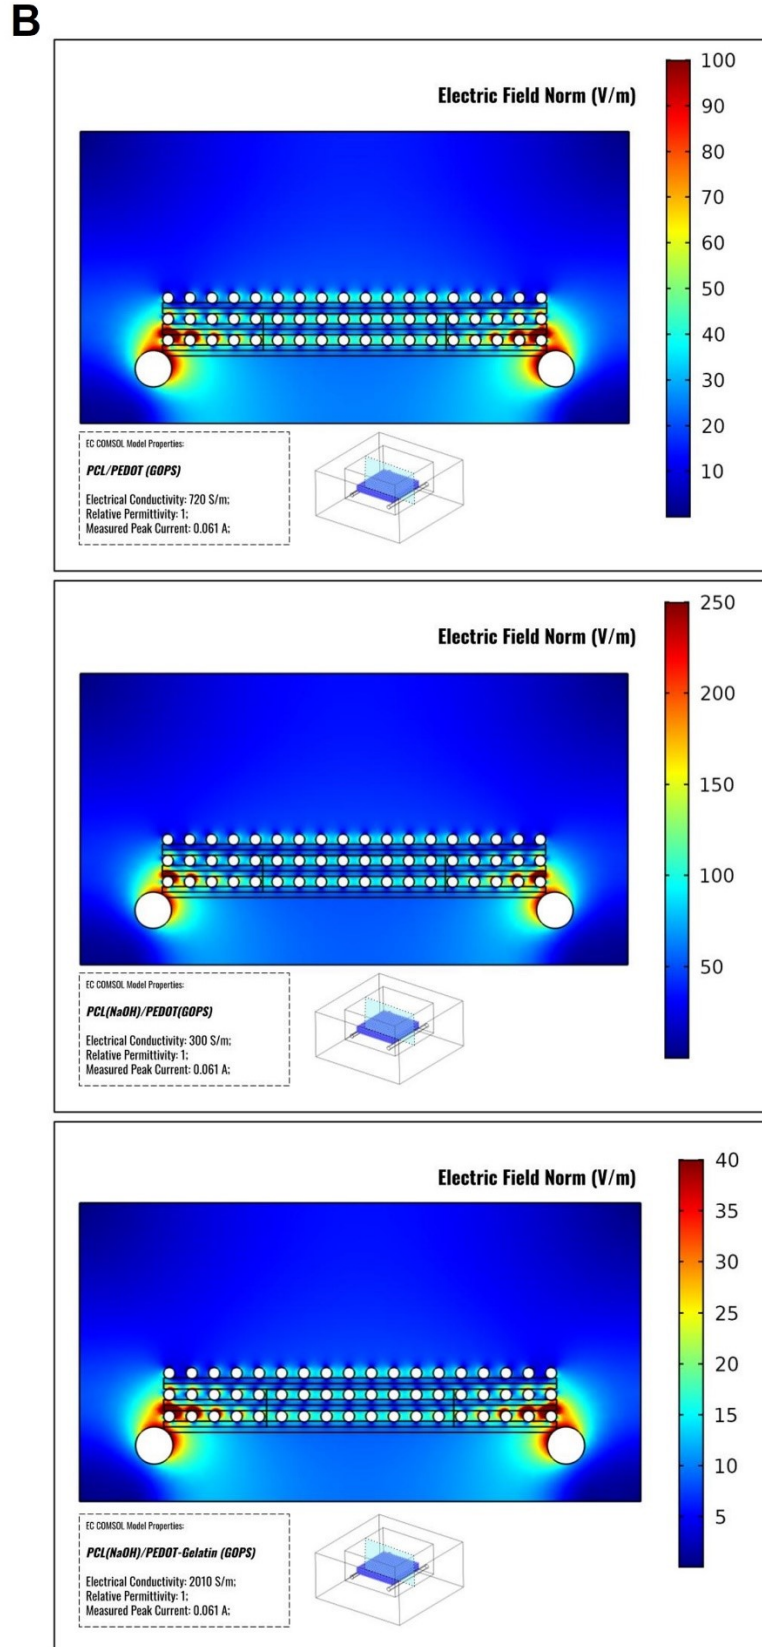

82

83 **Figure S7(B):** FEA analysis of electrical field intensity on the different PCL-  
 84 PEDOT samples tested: scaffolds with GOPS-based coatings.

C

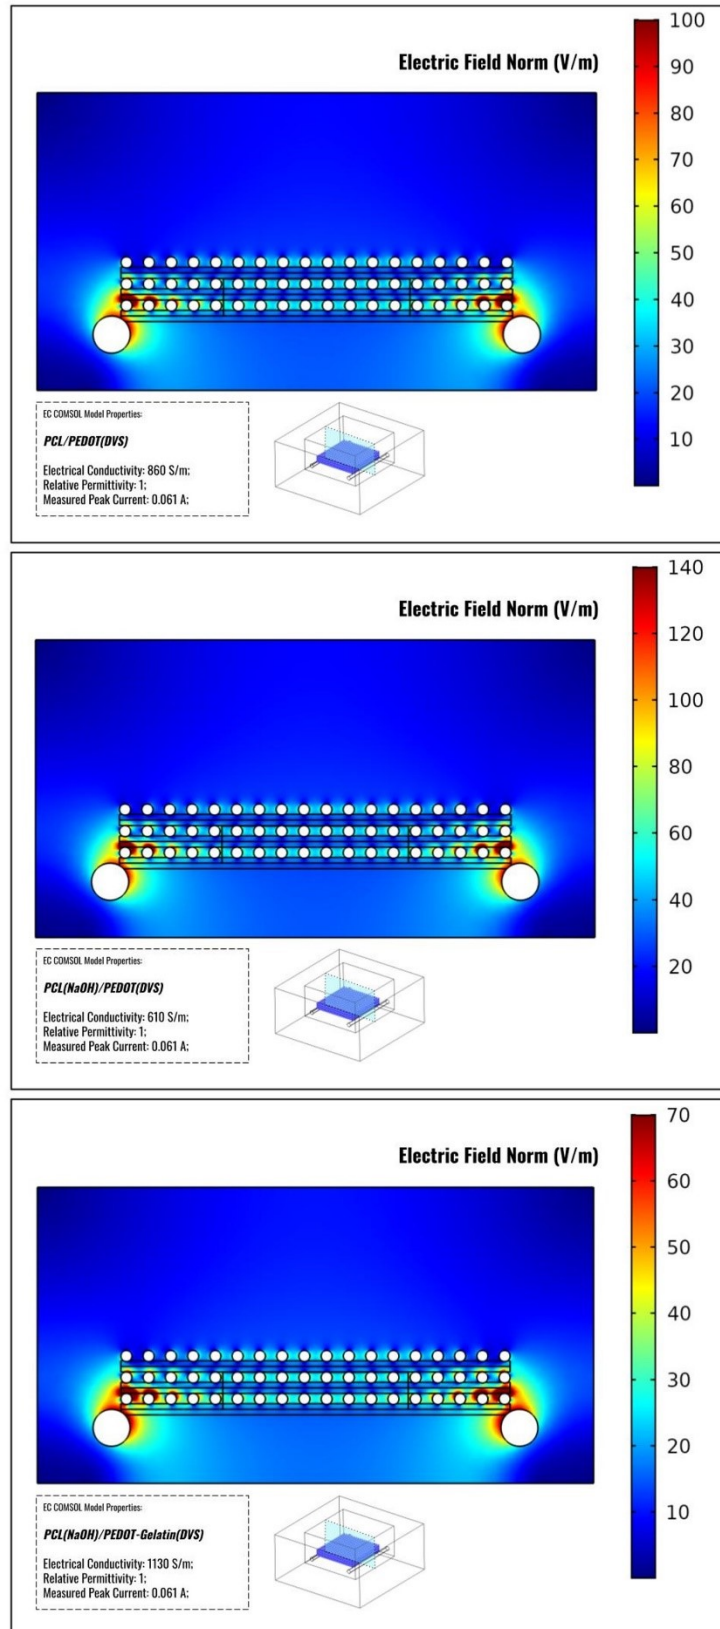

85

86 **Figure S7C:** FEA analysis of electrical field intensity on the different PCL-PEDOT

87 samples tested: scaffolds with DVS-based coatings.

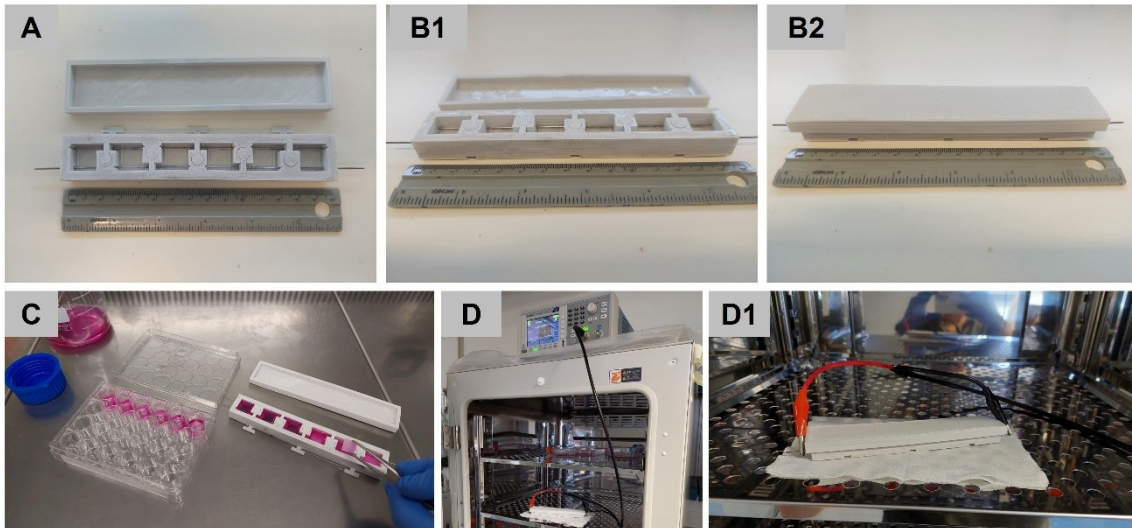

88

89 **Figure S8:** Visual aspect of the custom cell-culture plates used for electrical  
90 stimulation. **(A)** Top-view; **(B)** Side-view of the setup **(B1)** without and **(B2)** with  
91 the lid on; **(C)** Transferring of PCL and PCL-PEDOT:PSS scaffolds to the setup;  
92 **(D)** On going stimulation of scaffolds inside the setup and **(D1)** respective close-  
93 up., where the cathode (red) and anode (black) electrodes are visible.

94

95

96

97 **Table S1:** Properties of the materials used in FEA simulation (1\* means: unknown  
 98 values for electric permittivity that were considered as 1).

| <b>Material</b>        | <b>Electroconductivity<br/>(S m<sup>-1</sup>)</b> | <b>Electric<br/>Permittivity</b> |
|------------------------|---------------------------------------------------|----------------------------------|
| C8 composite           | 1 x 10 <sup>-14</sup>                             | 2.5                              |
| Stainless Steel 316LVM | 1 x 10 <sup>6</sup>                               | 1                                |
| Culture Medium         | 1.741 (Experimental)                              | 80.1                             |
| PCL                    | 1 x 10 <sup>-12</sup>                             | 2.5                              |
| PCL(NaOH)              | 1 x 10 <sup>-12</sup>                             | 2.5                              |
| GOPS                   | 720 ± 320 (This work)                             | 1*                               |
| GOPS(NaOH)             | 300 ± 270 (This work)                             | 1*                               |
| GOPS(NaOH)-Gel.        | 2010 ± 570 (This work)                            | 1*                               |
| DVS                    | 860 ± 420 (This work)                             | 1*                               |
| DVS(NaOH)              | 610 ± 400 (This work)                             | 1*                               |
| DVS(NaOH)-Gel.         | 1130 ± 320 (This work)                            | 1*                               |

99

100

101

102

103
